# Supplementary material for: Intermolecular interactions and charge transfer transitions in aromatic hydrocarbon–tetracyanoethylene complexes
Source: Royal Society of Chemistry journal article supplement (doi:10.1039/c4cp02900c), 2014-01-01
Supplement: c4cp02900c1.pdf [file c4cp02900c1.pdf]

Supporting Information for

**Ab initio Study of Charge Transfer Transitions in Complexes of Tetracyanoethylene with  
Aromatic Compounds**

Adélia A. J. Aquino, Itamar Borges, Jr, Reed Nieman, Andreas Köhn, and Hans Lischka

**Table of Contents**

|                                                                |        |
|----------------------------------------------------------------|--------|
| Table S1: Benzene/TCNE interaction energies                    | p. S2  |
| Table S2: Naphthalene/TCNE interaction energies                | p. S3  |
| Table S3: Anthracene/TCNE interaction energies                 | p. S4  |
| Table S4: Benzene/TCNE vertical excitation energies            | p. S5  |
| Table S5: Naphthalene/TCNE vertical excitation energies        | p. S6  |
| Table S6: Anthracene/TCNE (perp.) vertical excitation energies | p. S7  |
| Table S7: Anthracene/TCNE (para.) vertical excitation energies | p. S8  |
| Cartesian coordinates for the benzene/TCNE complex             | p. S9  |
| Cartesian coordinates for the naphthalene/TCNE complex         | p. S10 |
| Cartesian coordinates for the anthracene/TCNE (perp.) complex  | p. S11 |
| Cartesian coordinates for the anthracene/TCNE (para.) complex  | p. S12 |

**Table S1.** MP2 and CCSD association energies  $\Delta E$  (kcal/mol) for the benzene/TCNE complex in the ground state using SCS, SOS and F12 approaches.<sup>a,b</sup>

| Method                       | $\Delta E$ |
|------------------------------|------------|
| MP2/cc-pVTZ                  | -14.10     |
| SCS-MP2/ cc-pVTZ             | -10.17     |
| SOS-MP2/cc-pVTZ              | -8.20      |
| SOS-MP2/cc-pVTZ optim. geom. | -8.99      |
| MP2-F12/cc-pVDZ-F12          | -14.15     |
| SCS-MP2-F12/cc-pVDZ-F12      | -9.97      |
| SOS-MP2-F12/cc-pVDZ-F12      | -7.88      |
| CCSD/cc-pVTZ                 | -6.38      |
| CCSD(T)/cc-pVTZ              | -8.82      |
| CCSD(F12)/cc-pVDZ-F12        | -6.18      |
| CCSD(F12*)/cc-pVDZ-F12       | -6.18      |
| CCSD(F12*)(T)/cc-pVDZ-F12    | -8.56      |

<sup>a</sup> For the definition of methods and basis sets see the main text.

<sup>b</sup> If not stated differently, the MP2/cc-pVTZ geometry is used.

**Table S2.** MP2 and CCSD association energies  $\Delta E$  (kcal/mol) for the naphthalene/TCNE complex in the ground state using the SCS, SOS and F12 approaches.<sup>a,b</sup>

| Method                     | $\Delta E$ |
|----------------------------|------------|
| MP2/cc-pVTZ'               | -18.15     |
| SCS-MP2/cc-pVTZ'           | -12.69     |
| SOS-MP2/cc-pVTZ'           | -9.95      |
| SOS-MP2/cc-pVTZ' optimized | -11.10     |
| MP2-F12/cc-pVDZ-F12        | -18.19     |
| SCS-MP2-F12/cc-pVDZ-F12    | -12.32     |
| SOS-MP2-F12/cc-pVDZ-F12    | -9.38      |

<sup>a</sup> For the definition of methods and basis sets see the main text.

<sup>b</sup> If not stated differently, the MP2/cc-pVTZ' geometry is used.

**Table S3.** MP2 and CCSD association energies  $\Delta E$  (kcal/mol) for the perpendicular complex anthracene/TCNE in the ground state using the SCS, SOS and F12 approaches.<sup>a,b</sup>

| Method                     | $\Delta E$ |
|----------------------------|------------|
| MP2/cc-pVTZ'               | -25.84     |
| SCS-MP2/cc-pVTZ'           | -15.61     |
| SOS-MP2/cc-pVTZ'           | -10.49     |
| SOS-MP2/cc-pVTZ' optimized | -13.47     |
| MP2-F12/cc-pVDZ-F12        | -26.09     |
| SCS-MP2-F12//cc-pVDZ-F12   | -15.25     |
| SOS-MP2-F12/cc-pVDZ-F12    | -9.83      |

<sup>a</sup> For the definition of methods and basis sets see the main text.

<sup>b</sup> If not stated differently, the MP2/cc-pVTZ' geometry is used.

**Table S4.** Vertical excitation energies  $\Delta E_{\text{exc}}$  (eV) in the benzene/TCNE complex, oscillator strengths and charge transfer ( $q(\text{CT})$  in  $e$  units) using the ADC(2) method and the cc-pVTZ basis computed for two excited states per irreducible representation.

| State           | $\Delta E_{\text{exc}}$ | $f^{\text{b}}$ | $q(\text{CT})$ |
|-----------------|-------------------------|----------------|----------------|
| $1^1\text{A}_2$ | 3.229                   | 0.000          | 0.953          |
| $2^1\text{A}_1$ | 3.283                   | 0.086          | 0.934          |
| $1^1\text{B}_2$ | 4.852                   | 0.322          | 0.044          |
| $1^1\text{B}_1$ | 5.276                   | 0.001          | 0.088          |
| $2^1\text{B}_1$ | 5.501                   | 0.000          | 0.035          |
| $2^1\text{B}_2$ | 5.812                   | 0.000          | 0.158          |
| $2^1\text{A}_2$ | 5.910                   | 0.000          | 0.025          |
| $3^1\text{A}_1$ | 6.130                   | 0.003          | 0.032          |

**Table S5.** Vertical excitation energies  $\Delta E_{\text{exc}}$  (eV) in the naphthalene/TCNE complex, oscillator strengths and charge transfer ( $q(\text{CT})$  in  $e$  units) using the ADC(2) method and the cc-pVTZ' basis.

| State         | $\Delta E_{\text{exc}}$ | $f^{\text{b}}$ | $q(\text{CT})$ |
|---------------|-------------------------|----------------|----------------|
| $2^1\text{A}$ | 2.149                   | 0.008          | 0.959          |
| $3^1\text{A}$ | 2.958                   | 0.072          | 0.932          |
| $4^1\text{A}$ | 4.077                   | 0.028          | 0.896          |
| $5^1\text{A}$ | 4.397                   | 0.004          | 0.075          |
| $6^1\text{A}$ | 4.635                   | 0.036          | 0.160          |
| $7^1\text{A}$ | 4.759                   | 0.178          | 0.197          |
| $8^1\text{A}$ | 5.191                   | 0.086          | 0.631          |
| $9^1\text{A}$ | 5.367                   | 0.009          | 0.930          |

**Table S6.** Vertical excitation energies  $\Delta E_{\text{exc}}$  (eV) in the perpendicular anthracene/TCNE complex, oscillator strengths and charge transfer ( $q(\text{CT})$  in  $e$  units) using the ADC(2) method and the cc-pVTZ' basis computed for two excited states per irreducible representation.

| State           | $\Delta E_{\text{exc}}$ | $f^{\text{b}}$ | $q(\text{CT})$ |
|-----------------|-------------------------|----------------|----------------|
| $2^1\text{A}_1$ | 2.113                   | 0.180          | 0.787          |
| $1^1\text{A}_2$ | 3.028                   | 0.000          | 0.862          |
| $1^1\text{B}_2$ | 3.200                   | 0.043          | 0.837          |
| $1^1\text{B}_1$ | 3.485                   | 0.029          | 0.138          |
| $2^1\text{B}_2$ | 3.952                   | 0.023          | 0.089          |
| $3^1\text{A}_1$ | 4.390                   | 0.039          | 0.790          |
| $2^1\text{B}_1$ | 4.435                   | 0.181          | 0.511          |
| $2^1\text{A}_2$ | 4.537                   | 0.000          | 0.062          |

**Table S7.** Vertical excitation energies  $\Delta E_{\text{exc}}$  (eV) in the parallel anthracene/TCNE complex, oscillator strengths and charge transfer ( $q(\text{CT})$  in  $e$ ) using the ADC(2) method and the cc-pVTZ' basis computed for two excited states per irreducible representation.

| State           | $\Delta E_{\text{exc}}$ | $f^{\text{b}}$ | $q(\text{CT})$ |
|-----------------|-------------------------|----------------|----------------|
| $1^1\text{A}_2$ | 1.396                   | 0.000          | 0.962          |
| $2^1\text{A}_1$ | 2.741                   | 0.055          | 0.944          |
| $1^1\text{B}_1$ | 3.098                   | 0.000          | 0.946          |
| $2^1\text{B}_1$ | 3.533                   | 0.062          | 0.019          |
| $1^1\text{B}_2$ | 3.865                   | 0.002          | 0.043          |
| $2^1\text{A}_2$ | 4.189                   | 0.000          | 0.909          |
| $2^1\text{B}_2$ | 4.353                   | 0.027          | 0.618          |
| $3^1\text{A}_1$ | 5.544                   | 0.002          | 0.060          |



Cartesian coordinates (Å) for the benzene/TCNE complex using the SOS-MP2/cc-pVTZ method.

|   |            |            |            |
|---|------------|------------|------------|
| C | 1.2110846  | -0.6981203 | -1.4794736 |
| C | 1.2110846  | 0.6981203  | -1.4794736 |
| C | 0.0000000  | 1.3962037  | -1.4774858 |
| C | 0.0000000  | -1.3962037 | -1.4774858 |
| C | -1.2110846 | -0.6981203 | -1.4794736 |
| C | -1.2110846 | 0.6981203  | -1.4794736 |
| H | 2.1477495  | -1.2395298 | -1.4797761 |
| H | 2.1477495  | 1.2395298  | -1.4797761 |
| H | 0.0000000  | 2.4786562  | -1.4828159 |
| H | 0.0000000  | -2.4786562 | -1.4828159 |
| H | -2.1477495 | -1.2395298 | -1.4797761 |
| H | -2.1477495 | 1.2395298  | -1.4797761 |
| C | 0.0000000  | -0.6808318 | 1.7449264  |
| C | 0.0000000  | 0.6808318  | 1.7449264  |
| C | 1.2259346  | 1.4265404  | 1.7650182  |
| C | 1.2259346  | -1.4265404 | 1.7650182  |
| C | -1.2259346 | -1.4265404 | 1.7650182  |
| C | -1.2259346 | 1.4265404  | 1.7650182  |
| N | 2.2112424  | 2.0542879  | 1.8019191  |
| N | -2.2112424 | 2.0542879  | 1.8019191  |
| N | 2.2112424  | -2.0542879 | 1.8019191  |
| N | -2.2112424 | -2.0542879 | 1.8019191  |

Cartesian coordinates (Å) for the naphthalene/TCNE complex using the SOS-MP2/cc-pVTZ' method.

|   |            |            |            |
|---|------------|------------|------------|
| C | -0.8132765 | 1.3997778  | -1.1760326 |
| C | 0.4290626  | 0.7051305  | -1.1273827 |
| C | 0.4272715  | -0.7199503 | -1.1476725 |
| C | -0.8163526 | -1.4074761 | -1.2100446 |
| C | -2.0026655 | -0.7103398 | -1.2449051 |
| C | -2.0011454 | 0.7094615  | -1.2297611 |
| C | 1.6716816  | 1.3943891  | -1.0626215 |
| C | 2.8549064  | 0.6954277  | -1.0208372 |
| C | 2.8524770  | -0.7225674 | -1.0423934 |
| C | 1.6668540  | -1.4149107 | -1.1056356 |
| H | -0.8087069 | 2.4879208  | -1.1669701 |
| H | -0.8158262 | -2.4955269 | -1.2280710 |
| H | -2.9485500 | -1.2449484 | -1.2944869 |
| H | -2.9451048 | 1.2477404  | -1.2616332 |
| H | 1.6705469  | 2.4825920  | -1.0493348 |
| H | 3.8006671  | 1.2287241  | -0.9679653 |
| H | 3.7958788  | -1.2606852 | -1.0029733 |
| H | 1.6615462  | -2.5028488 | -1.1183161 |
| C | -1.2826655 | -0.4356756 | 1.9822943  |
| C | -0.2568426 | 0.4601600  | 2.0222939  |
| C | 1.1057224  | 0.0270876  | 2.1346591  |
| C | -1.0300139 | -1.8475221 | 2.0211078  |
| C | -2.6503467 | -0.0041216 | 1.9460395  |
| C | -0.5010379 | 1.8743574  | 2.0191879  |
| N | 2.2180654  | -0.3060600 | 2.2743738  |
| N | -0.6769215 | 3.0298062  | 2.0394955  |
| N | -0.8344156 | -2.9989230 | 2.0701597  |
| N | -3.7708086 | 0.3289806  | 1.9474258  |

Cartesian coordinates (Å) for the anthracene/TCNE (perp.) complex using the SOS-MP2/cc-pVTZ' method.

|   |            |            |            |
|---|------------|------------|------------|
| C | -1.4097052 | -2.4753329 | -0.9352377 |
| C | -0.7174452 | -1.2251617 | -0.9258409 |
| C | -1.4018775 | 0.0000000  | -0.9046300 |
| C | -0.7174452 | 1.2251617  | -0.9258409 |
| C | -1.4097052 | 2.4753329  | -0.9352377 |
| C | -0.7129456 | 3.6542147  | -0.9412184 |
| C | 0.7129456  | 3.6542147  | -0.9412184 |
| C | 1.4097052  | 2.4753329  | -0.9352377 |
| C | 0.7174452  | 1.2251617  | -0.9258409 |
| C | 1.4018775  | 0.0000000  | -0.9046300 |
| C | 0.7174452  | -1.2251617 | -0.9258409 |
| C | 1.4097052  | -2.4753329 | -0.9352377 |
| C | 0.7129456  | -3.6542147 | -0.9412184 |
| C | -0.7129456 | -3.6542147 | -0.9412184 |
| H | -2.4973103 | -2.4743732 | -0.9290344 |
| H | -2.4920693 | 0.0000000  | -0.9061131 |
| H | -2.4973103 | 2.4743732  | -0.9290344 |
| H | -1.2466031 | 4.6010921  | -0.9422127 |
| H | 1.2466031  | 4.6010921  | -0.9422127 |
| H | 2.4973103  | 2.4743732  | -0.9290344 |
| H | 2.4920693  | 0.0000000  | -0.9061131 |
| H | 2.4973103  | -2.4743732 | -0.9290344 |
| H | 1.2466031  | -4.6010921 | -0.9422127 |
| H | -1.2466031 | -4.6010921 | -0.9422127 |
| C | 0.6845069  | 0.0000000  | 2.1651351  |
| C | -0.6845069 | 0.0000000  | 2.1651351  |
| C | -1.4268130 | 1.2245374  | 2.2149711  |
| C | 1.4268130  | 1.2245374  | 2.2149711  |
| C | 1.4268130  | -1.2245374 | 2.2149711  |
| C | -1.4268130 | -1.2245374 | 2.2149711  |
| N | -2.0452828 | 2.2154080  | 2.2813769  |
| N | -2.0452828 | -2.2154080 | 2.2813769  |
| N | 2.0452828  | 2.2154080  | 2.2813769  |
| N | 2.0452828  | -2.2154080 | 2.2813769  |

Cartesian coordinates (Å) for the anthracene/TCNE (parallel) complex using the SOS-MP2/cc-pVTZ' method. Used the same coordinates twice for para and perp.

|   |            |            |            |
|---|------------|------------|------------|
| C | 1.4097777  | -2.4762541 | -0.9701016 |
| C | 0.7183012  | -1.2214393 | -0.9646530 |
| C | 1.4048240  | 0.0000000  | -0.9587938 |
| C | 0.7183012  | 1.2214393  | -0.9646530 |
| C | 1.4097777  | 2.4762541  | -0.9701016 |
| C | 0.7150094  | 3.6537272  | -0.9741965 |
| C | -0.7150094 | 3.6537272  | -0.9741965 |
| C | -1.4097777 | 2.4762541  | -0.9701016 |
| C | -0.7183012 | 1.2214393  | -0.9646530 |
| C | -1.4048240 | 0.0000000  | -0.9587938 |
| C | -0.7183012 | -1.2214393 | -0.9646530 |
| C | -1.4097777 | -2.4762541 | -0.9701016 |
| C | -0.7150094 | -3.6537272 | -0.9741965 |
| C | 0.7150094  | -3.6537272 | -0.9741965 |
| H | 2.4975344  | -2.4740412 | -0.9616939 |
| H | 2.4943460  | 0.0000000  | -0.9602782 |
| H | 2.4975344  | 2.4740412  | -0.9616939 |
| H | 1.2488120  | 4.6007379  | -0.9743069 |
| H | -1.2488120 | 4.6007379  | -0.9743069 |
| H | -2.4975344 | 2.4740412  | -0.9616939 |
| H | -2.4943460 | 0.0000000  | -0.9602782 |
| H | -2.4975344 | -2.4740412 | -0.9616939 |
| H | -1.2488120 | -4.6007379 | -0.9743069 |
| H | 1.2488120  | -4.6007379 | -0.9743069 |
| C | 0.0000000  | -0.6816769 | 2.2683103  |
| C | 0.0000000  | 0.6816769  | 2.2683103  |
| C | 1.2285377  | 1.4214392  | 2.3036375  |
| C | 1.2285377  | -1.4214392 | 2.3036375  |
| C | -1.2285377 | -1.4214392 | 2.3036375  |
| C | -1.2285377 | 1.4214392  | 2.3036375  |
| N | 2.2236298  | 2.0319513  | 2.3666953  |
| N | -2.2236298 | 2.0319513  | 2.3666953  |
| N | 2.2236298  | -2.0319513 | 2.3666953  |
| N | -2.2236298 | -2.0319513 | 2.3666953  |
